# Supplementary material for: Bartonella- and Borrelia-Related Disease Presenting as a Neurological Condition Revealing the Need for Better Diagnostics
Source: MDPI journal article supplement (doi:10.3390/microorganisms12010209), 2024-01-19
Supplement: s1 [file s1]

**Table S1:** Sequence confirmation that primers amplify correct target.

| Gene Name                                                                                                                       | Direct Sequencing of PCR amplicon using Hemi-nested or Touch Down PCR                                                                                                                                                                                             | GenBank Accession number |
|---------------------------------------------------------------------------------------------------------------------------------|-------------------------------------------------------------------------------------------------------------------------------------------------------------------------------------------------------------------------------------------------------------------|--------------------------|
| <i>Bartonella vinsonii</i> subsp. berkhoffii 16S ribosomal RNA gene, partial sequence (16S-23S ribosomal RNA intergenic spacer) | GAGGACTTGAACCTCCGACCTCACGCTTATCAAG<br>CGCGCGCTCTAACCAACTGAGCTACAAGCCCTCC<br>GGGATAAACCGGAAAACCTTCCCCGGAAAACCTC<br>TTAAAAAAGCAAACCTCTCAAATAAAAGAGCAAA<br>CTCTTAGATAAAAAAATACACTCTTACAGGAAAGT<br>TTTTCTTTAATTTTATAAAAAAATTTTCTTAAAGG<br>GTGTTTTCTTAAAAAGCCCTCTTTTTT | AF312503.1               |
| <i>Bartonella henselae</i> strain Houston-I chromosome, complete genome (16S-23S ribosomal RNA intergenic spacer)               | GAGGACTTGAACCTCCGACCTCACGCTTATCAAG<br>CGCGCGCTCTAACCAACTGAGCTACAAGCCCTCC<br>GGGATAAACCGGAAAACCTTCCCCGGGCATCCTCT<br>TATAAAACGCTTAAATTTTATCAAGGAAAGCGTTT<br>TTCAAAGCCCACGGTGGACTTGTTTTGTCTAGATC<br>GCCAGAAGGCTTGGGATCATCATCTGAAG                                    | CP020742.1               |
| <i>Bartonella henselae</i> strain Houston-I chromosome, complete genome (BRT1)                                                  | CCTGGAAGCTCTAACATCGAACACAGAATAAATC<br>CGCCTTGCGGGTATCCCGGAATTTCCGGGGGCTCT<br>TGTTATGTCCAAGTGCTTCTCAGCACTAAAAGCA<br>AGAGACTGATTGATGTCAGTGCTTCCAGACC                                                                                                                | CP020742.1               |
| <i>Borrelia burgdorferi</i> isolate Chosun M10-8Sp outer surface protein A (OspA) gene, partial cds                             | TTCAAGTGTGGTTTGACCTAGATCGTCAGAAATTG<br>TTAATTTTACTTTACTTTTGTGAGCTTCTACGCCTT<br>CAAGTACTCCAGATCCATTGTTTTTATCAGAAGTT<br>CCTTTAAGCTCAAGCTTGCTACTGTTGCAATTAG<br>ATCGTACTTGCCGTCTTTGTTTTTTCTTTGCTTAC<br>AAGAACTTTCATTTACCCAGGCAAGTCTACTGAA<br>ACGCTGTTT                | MF948162.1               |
| <i>Borrelia burgdorferi</i> strain MM1 chromosome main, complete sequence (P13)                                                 | ATGAAACTAGCAAGCAAGATCCTATTGTACCATT<br>TTATTGAACCCTTTTTTAGGGTTTGGAATAGGCTC<br>CTTTGCTCAAGGAGATATTCTTGGAGGTTCTCTTA<br>TTCTTGGATTGATGCGGTTGGTATAGGGCA                                                                                                                | CP031412.1               |

|                                                                                                              |                                                                                                                                                                                                 |            |
|--------------------------------------------------------------------------------------------------------------|-------------------------------------------------------------------------------------------------------------------------------------------------------------------------------------------------|------------|
| <i>Babesia microti</i><br>isolate GXS54<br>small subunit<br>ribosomal RNA<br>gene, partial<br>sequence (18S) | GAAGACGATCAGATACCGTCGTAGTCCTAACCAT<br>AAACTATGCCGACTAGAGATTGGAGGTCGTCAGT<br>TTAAACGACTCCTTCAGCACCTTGAGAGAAATCA<br>AAGTCTTTGGGTTCTGGGGGGAGTATGGTCGCAA<br>GTCCGAAACTTAAAGGAATTGACGGAAGGGCAC<br>CA | OR117721.1 |
|--------------------------------------------------------------------------------------------------------------|-------------------------------------------------------------------------------------------------------------------------------------------------------------------------------------------------|------------|
